# Supplementary material for: Profiling feedback antecedents in higher education students: a person-oriented perspective
Source: Frontiers journal article supplement (doi:10.3389/feduc.2024.1475944), 2024-11-13
Supplement: Data_Sheet_1.docx [file Data_Sheet_1.docx]

**Appendix A: Feedback Skills Instrument**

Please read the following statements regarding your skills when collaborating with other students. Consider your skills on a scale from very low to very high.

Consider your skills in…

… giving positive feedback to other students

… receiving positive feedback from other students

… giving negative feedback to other students

… receiving negative feedback to other students

… making changes based on negative feedback you receive from other students

… formulating negative feedback for other students

… formulating positive feedback for other students

… making changes based on positive feedback you receive from other students
